# Supplementary material for: Core-shell structured Co3O4@PPy composite for electrochemical determination of terbutylhydroquinone
Source: Royal Society of Chemistry journal article supplement (doi:10.1039/d2ra05574k), 2022-01-01
Supplement: d2ra05574k1.pdf [file d2ra05574k1.pdf]

## Supporting Information

### Core-shell Structured $\text{Co}_3\text{O}_4@\text{PPy}$ Composite for Electrochemical Determination of Tertbutylhydroquinone

Yuxi Zhang<sup>a,‡,\*</sup>, Cunli Wang<sup>b,‡</sup>, Yalin Zhao<sup>b</sup>, Zhe Yu<sup>b</sup>, Fengchun Yang<sup>a, b</sup>,  
\*, Xin Zhang<sup>a,\*</sup>

<sup>a</sup> *The Institute of Hydrogeology and Environmental Geology, Chinese Academy of Geological Sciences, Key Laboratory of Groundwater Contamination and Remediation, China Geological Survey & Hebei Province, Shijiazhuang, Hebei, 050061, China.*

<sup>b</sup> *Key Laboratory of Synthetic and Natural Functional Molecule Chemistry of Ministry of Education, College of Chemistry & Material Science, Northwest University, Xi'an 710127, China*

<sup>‡</sup> *Yuxi Zhang and Cunli Wang contributed equally.*

*E-mail: zhangyuxi@mail.cgs.gov.cn, fyang@nwu.edu.cn, zhangxin@nwu.edu.cn*

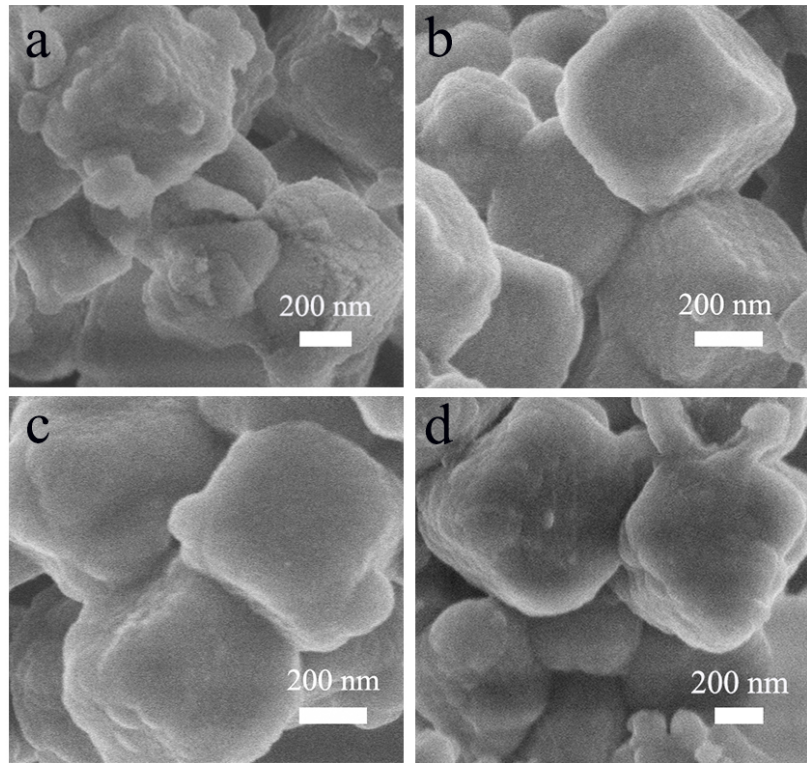

Figure S1. SEM images of  $\text{Co}_3\text{O}_4@\text{PPy}$  synthesized with various volume of Py monomer 6  $\mu\text{L}$  (a), 12  $\mu\text{L}$  (b), 18  $\mu\text{L}$  (c), 24  $\mu\text{L}$  (d).

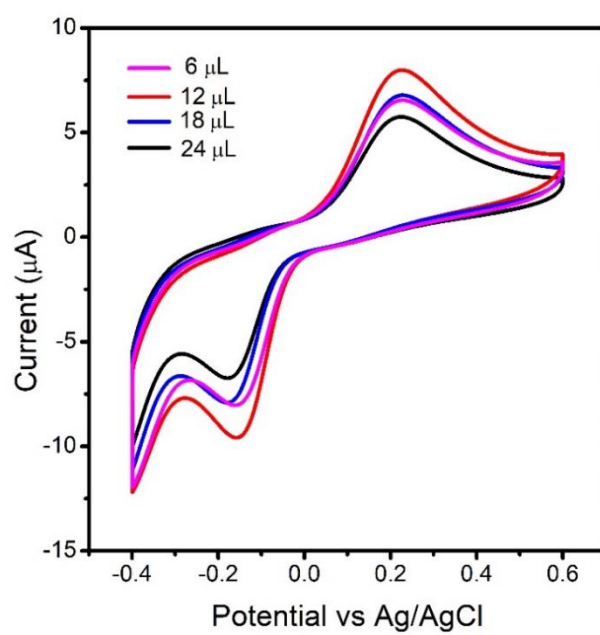

Figure S2. CVs of  $\text{Co}_3\text{O}_4@\text{PPy}$  in 0.1 M PBS (pH 7.0) containing 100  $\mu\text{M}$  TBHQ with 6  $\mu\text{L}$ , 12  $\mu\text{L}$ , 18  $\mu\text{L}$ , 24  $\mu\text{L}$  Py monomer.

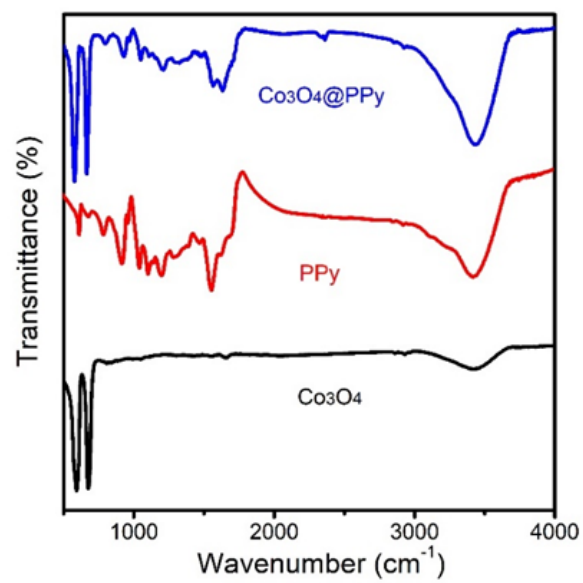

Figure S3. FT-IR spectrum of Co<sub>3</sub>O<sub>4</sub>, PPy and Co<sub>3</sub>O<sub>4</sub>@PPy.

Table S1. Attributions of characteristic peaks on the FT-IR spectrum of Co<sub>3</sub>O<sub>4</sub>@PPy.

| Wave number (cm <sup>-1</sup> ) | Mode of vibration                                             | Reference |
|---------------------------------|---------------------------------------------------------------|-----------|
| 669                             | Co-O                                                          | [28]      |
| 572                             |                                                               | [28]      |
| 792                             | the presence of polymerized pyrrole                           | [29]      |
| 927                             | =C-H out-of-plane of polypyrrole                              | [30]      |
| 1045                            | N-H in-plane deformation of H <sup>+</sup> -doped polypyrrole | [29]      |
| 1109                            | C-N stretching                                                | [31]      |
| 1315                            | C-H in-plane                                                  | [31]      |
| 1554                            | symmetric pyrrole ring-stretching                             | [33]      |
| 1465                            | C=C and C-N stretching of pyrrole ring                        | [32]      |
| 1640                            |                                                               | [30]      |
| 3423                            | O-H stretching vibration                                      | [34]      |

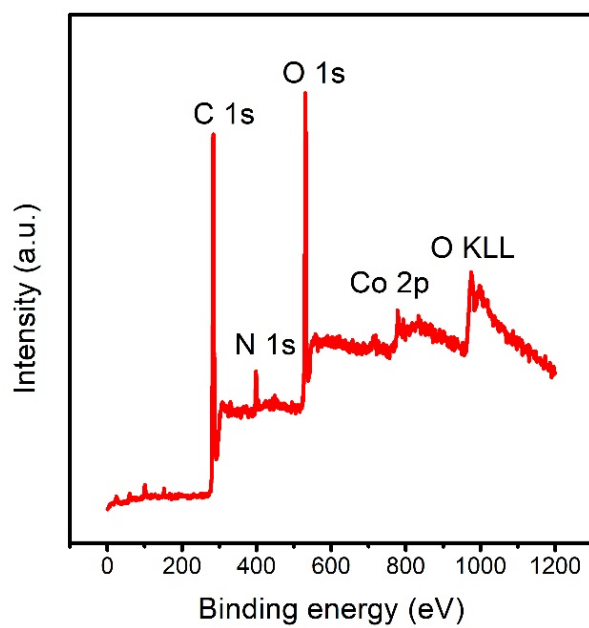

Figure S4. XPS survey spectrum of  $\text{Co}_3\text{O}_4@\text{PPy}$ .

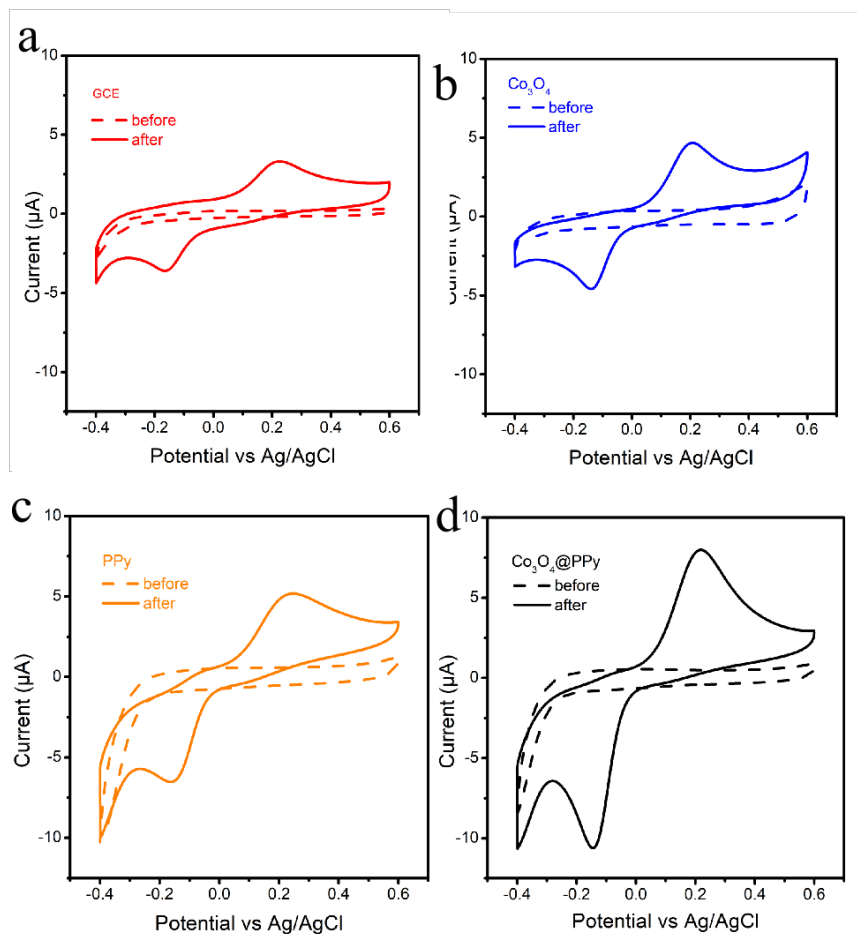

Figure S5. CVs of (a) GCE (b)  $\text{Co}_3\text{O}_4$  (c) PPy (d)  $\text{Co}_3\text{O}_4@\text{PPy}$  before( dotted) and after( solid) adding 100  $\mu\text{M}$  TBHQ in 0.1 M PBS ( $\text{pH} = 7$ ).

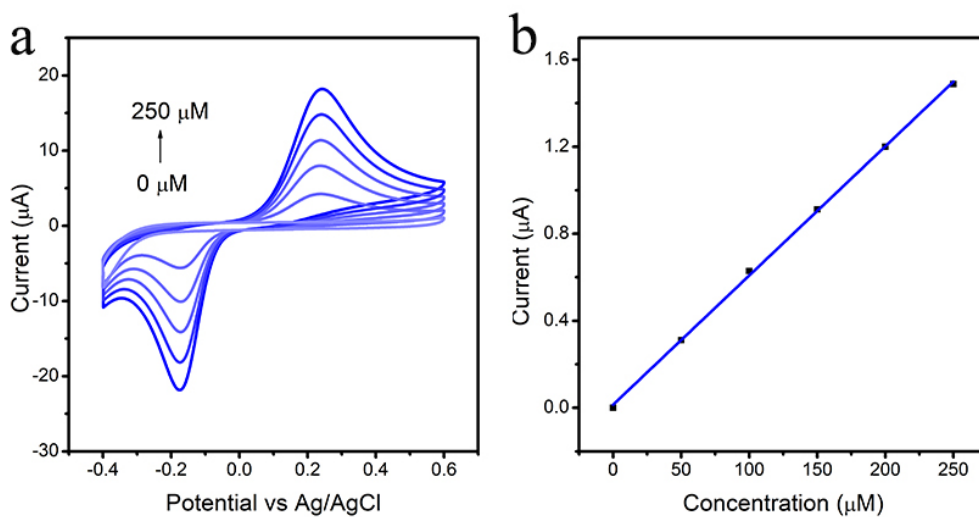

Figure S6. (a) CVs of  $\text{Co}_3\text{O}_4@\text{PPy}/\text{GCE}$  in 0.1 M PBS (pH = 7) containing individual concentrations of TBHQ (0, 50, 100, 150, 200, 250). (b) Corresponds to a linear relationship between TBHQ concentrations and current response.



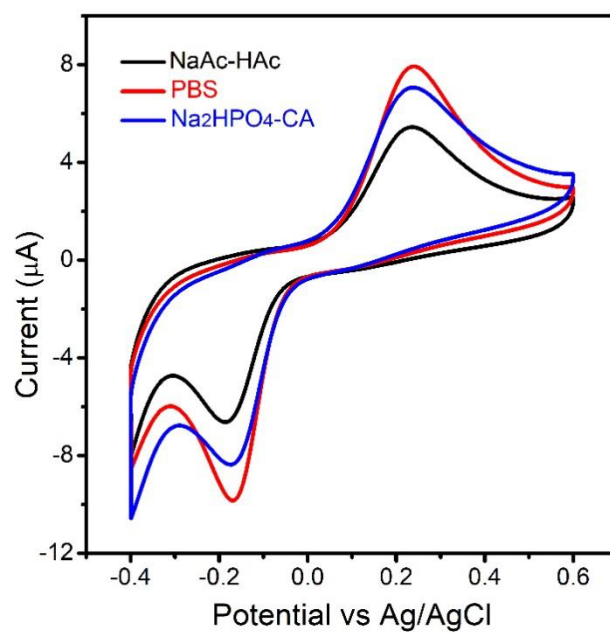

Figure S7. CVs of  $\text{Co}_3\text{O}_4@\text{PPy}/\text{GCE}$  in different buffer solution containing  $100\ \mu\text{M}$  TBHQ.

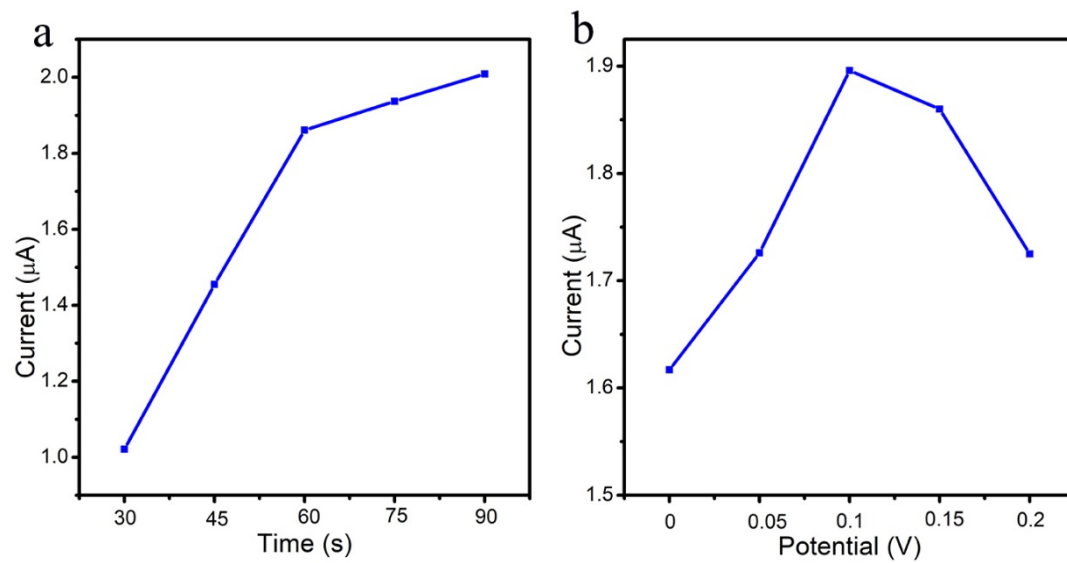

Figure S8. The effects of accumulation time (a) and accumulation potential (b) on the oxidation current of 100  $\mu\text{M}$  TBHQ in 0.1 M PBS solution (pH 7.0).

Table S2. Comparison of TBHQ test with previous literature

| Electrode materials                      | Linear range<br>( $\mu\text{M}$ ) | LOD<br>( $\mu\text{M}$ ) | References |
|------------------------------------------|-----------------------------------|--------------------------|------------|
| MIP/ZC/GCE                               | 1-75                              | 0.42                     | [8]        |
| PdAuNPs/ERGO/GCE                         | 3-360                             | 0.28                     | [6]        |
| Zn TPHS@GO/GCE                           | 0.80–65                           | 0.137                    | [36]       |
| Poly(methacrylic<br>acid-hemin)-MWNT/GCE | 2.84-150                          | 0.85                     | [7]        |
| $\text{Co}_3\text{O}_4$ @PPy/GCE         | 0.2-600                           | 0.05                     | This work  |

Table S3. Determination of TBHQ added sesame oil.

| Real samples | TBHQ spiked<br>( $\mu\text{M}$ ) | TBHQ found<br>( $\mu\text{M}$ ) | Recovery<br>(%) | RSD<br>(%) |
|--------------|----------------------------------|---------------------------------|-----------------|------------|
| Sesame oil   | 50                               | 50.5                            | 101             | 2.0        |
|              | 80                               | 79.2                            | 99.0            | 2.1        |
|              | 100                              | 99.9                            | 99.9            | 3.6        |
